1 **A review of scientific theories used to justify the delivery**  
2 **of school-based mindfulness programmes . A protocol for**  
3 **a scoping review**

4

5

6 Pamela Abbott<sup>1,2\*</sup>, Graeme Nixon<sup>1,2</sup>, Isabel Stanley<sup>1,2</sup>, Lucia D’Ambruoso<sup>1,3</sup>

7

8 <sup>1</sup>Centre for Global Development, University of Aberdeen, Aberdeen, UK

9

10 <sup>2</sup>School of Education, University of Aberdeen, Aberdeen, UK

11

12 <sup>3</sup>Centre for Data Science, University of Aberdeen, Aberdeen, UK

13

14 \*Corresponding Author

15

16 Email: [p.abbott@abdn.ac.uk](mailto:p.abbott@abdn.ac.uk)

17

18

19

20

21

22

NOTE: This preprint reports new research that has not been certified by peer review and should not be used to guide clinical practice.

## 23 **Abstract**

### 24 **Background**

25 Mindfulness-based interventions are increasingly delivered in schools with the aim of  
26 promoting the mental wellbeing of pupils. The apparent success of such interventions has  
27 led to calls for mindfulness to be included in the school curriculum. However, the findings are  
28 more mixed than is often acknowledged and this may in part be because the theories  
29 justifying are rarely considered. Understanding the scientific theories underpinning SBMIs  
30 may improve the outcomes from interventions. In this paper we outline our scoping review  
31 protocol to systematically review the literature to map the scientific theories that have been  
32 identified to justify using school-based mindfulness interventions to promote pupils'  
33 wellbeing.

### 34 **Methods**

35 The scoping review methodology will guide the conduct of the review. We will limit our  
36 search to scholarly databases and PhD theses to ensure the credibility of the theories. The  
37 following databases will be used: MEDLINE, PsychINFO, Web of Science Core Collection,  
38 PubMed Central, Scopus and ProQuest Dissertations and Theses. Two reviewers will  
39 independently screen all abstracts and full-text studies for inclusion. We will include any  
40 study that includes a theoretical explanation linking a mindfulness intervention with its  
41 impact. Information from the papers will be extracted using a framework developed by the  
42 team.

### 43 **Discussion**

44 The scoping review will map, classify and compare scientific theories that have been used in  
45 the literature to justify the use of school-based mindfulness intervention to promote pupils'  
46 mental wellbeing. The findings will be disseminated through a peer -reviewed journal article,  
47 conference presentations, our project website and social media.

48

## 49 **Key Words**

50 Mindfulness; mental wellbeing; mechanisms of mindfulness; theories of mindfulness;  
51 theoretical models; theoretical frameworks

## 52 **Background**

53 The proposed literature review aims to investigate the theoretical frameworks underpinning  
54 school-based mindfulness interventions (SBMIs) designed to promote pupils' mental  
55 wellbeing. It is often claimed that mindfulness interventions are informed by theories and  
56 practices from contemplative traditions, science, medicine, psychology and education [1–3].  
57 However, the theories underlying them are rarely discussed in the literature, which has  
58 focused on determining if they work, that is, if interventions have the intended outcomes.  
59 The apparent success of SBMIs in promoting the wellbeing of children and young people,  
60 as evidenced by systematic reviews and meta-analyses [4–10], especially when integrated  
61 into a whole-school approach [4,7,11], has led to calls for mindfulness to be included in the  
62 school curriculum [12–14]. Mindfulness interventions have also been shown to reduce  
63 teachers' stress levels, improve their mental wellbeing and life satisfaction, and their  
64 relationships with students making classroom environments more conducive to student  
65 learning [13–18].  
66 However, the reviews have been more mixed than is often acknowledged, and claims for the  
67 effectiveness of mindfulness may have been exaggerated [19]. The mixed findings from  
68 reviews may, at least in part, be due to the heterogeneity in SBMIs in educational settings.  
69 There is a lack of agreement on what mindfulness is [1], and programmes differ in content,  
70 how they are delivered, who delivers the training and the length and intensity of the training  
71 [20]. They can be whole school interventions with mindfulness built into the school  
72 curriculum, or sometimes only taught to some years or classes or only used with some  
73 children, usually those with behavioural or mental health problems [7,20].

74 It has been argued that complex interventions based on theory can be more effective [24],  
75 enabling an understanding of how the intervention worked, not just if it worked. When a  
76 theory of what mindfulness *is* and *does* underlies the intervention, it provides additional  
77 insight into the characteristics of effective interventions  
78 The findings will enable us to refine the programme theory for research we are carrying out  
79 examining the potential for SBMIs to promote the mental wellbeing of children and  
80 adolescents in Rwanda and Ethiopia [25] by helping us to identify what concretely needs to  
81 be included in any intervention to obtain the intended outcomes.

## 82 **Methods /Design**

83 To achieve our aims and objectives, we will conduct a scoping review to map scientific  
84 theories that underpin mindfulness interventions aimed at promoting pupils' mental  
85 wellbeing, drawing on Peters et al. best practice guidelines for reporting items for the  
86 development of scoping review [26]. In doing so, we will take account of the advice of Mhairi  
87 Campbell and her colleagues based on their experience of doing a review of theories, given  
88 that there are no agreed standards for theoretical reviews [27].

89 A scoping review suits our purpose because we are not primarily concerned with study  
90 designs and findings but are more interested in the theories used to justify the use of  
91 mindfulness intervention to promote pupils' mental wellbeing. For this reason, there is no  
92 need to conduct a methodological appraisal of the studies that will be included in our review  
93 because we are specifically interested in what they were looking for, what they *expected* to  
94 find, and why, rather than *what* they found. However, to ensure the credibility of the theories,  
95 we will limit our search to peer review articles and PhDs.

96

97 We will use the Preferred Reporting Items for Systematic Reviews and Meta-Analysis  
98 extension for Scoping Reviews (PRISMA-ScR) guidance to ensure rigour and facilitate  
99 replication (S1 Table: **Preferred Reporting Items for Systematic reviews and Meta-**

100 Analyses extension for Scoping Reviews (PRISMA-ScR) Checklist). The steps involved are  
101 (1) identifying the research question; (2) identifying relevant studies; (3) selecting studies for  
102 inclusion; (4) charting the studies; and (5) collating, summarising, and reporting the results.

### 103 **Step 1: Identifying the research question.**

104 The objective of the review is to provide a comprehensive descriptive map and explanation  
105 of the theories that have been used to describe the causal pathway between mindfulness  
106 practice and mental wellbeing in SBMIs for pupils aged 7-16 years.

- 107 1. What theories and frameworks have been identified and described in the literature?
- 108 2. How can these theories be classified?

### 109 **Step 2: search for evidence**

#### 110 **Search techniques**

111 The literature search will be in two phases: searching electronic databases and citation  
112 tracking (S2 Table: Search Strategy). We will also identify relevant articles from our previous  
113 search for documents for a critical realist synthesis of SBMIs. The documents that meet our  
114 inclusion criteria will be downloaded for further screening. The search will be restricted to  
115 publications in the English language. The search terms and the databases used are based  
116 on the advice of an academic librarian.

#### 117 **Databases**

118 We will limit our search to scholarly databases and PhD theses to ensure the credibility of  
119 the theories. The following databases will be used: MEDLINE, PsychINFO, Web of Science  
120 Core Collection, PubMed Central, Scopus and ProQuest Dissertations and Theses.

#### 121 **Search strategy and terms**

122 The search terms we will use are: 'mindfulness' or 'mindful' and 'wellbeing' or 'mental health'  
123 or 'health' or 'mental wellbeing' or 'happiness' or 'happy' and 'mechanisms' or 'theory' or  
124 'theorisation' or 'conceptual' or 'conceptualisation' or 'concept' or 'framework' or 'mediators' or  
125 'moderators' or 'process' or 'effects' or 'scholarship' and 'school' or 'classroom' or 'education'

126 and 'pupil' or 'child' or 'adolescent' or 'teen' or 'student'. Search terms will be adapted for  
 127 each database. For example, see Table 1 for the search string for MEDLINE and Scopus.

128 **Table 1: Search Terms for MEDLINE and Scopus**

|                                              |                                                                                                                                                                                                                                                                                                                                                                                                                                                                   |
|----------------------------------------------|-------------------------------------------------------------------------------------------------------------------------------------------------------------------------------------------------------------------------------------------------------------------------------------------------------------------------------------------------------------------------------------------------------------------------------------------------------------------|
| <b>M<br/>E<br/>D<br/>L<br/>I<br/>N<br/>E</b> | <p>#1 = ((mindfulness or mindful) and (wellbeing or "mental health" or health or "mental wellbeing" or happiness or happy) and (mechanisms or theory or theorisation or conceptual or conceptualisation or concept or framework or mediators or moderators or process or effects or scholarship) and (school or classroom or education) and (pupil or child or adolescent or teen or student)).ab,kf,ti.</p> <p>#2 = limit 1 to english language</p>              |
| <b>S<br/>c<br/>o<br/>p<br/>e<br/>s</b>       | <p>TITLE-ABS-KEY ( ( mindfulness OR mindful ) AND ( wellbeing OR "mental health" OR health OR "mental wellbeing" OR happiness OR happy ) AND ( mechanisms OR theory OR theorisation OR conceptual OR conceptualisation OR concept OR framework OR mediators OR moderators OR process OR effects OR scholarship ) AND ( school OR classroom OR education ) AND ( pupil OR child OR adolescent OR teen OR student ) ) AND ( LIMIT-TO ( LANGUAGE , "English" ) )</p> |

129

130 **Inclusion/exclusion criteria**

131 We will consider all discussion, scholarship or methodology papers that discuss a named  
 132 generalisable theory or framework for explaining the causal pathway between mindfulness  
 133 practice and mental wellbeing in SBMIs that are not just targeted at problem pupils. It is  
 134 anticipated that some studies will discuss their proposed model within the context of a  
 135 systematic review.

136 There has been a proliferation of mindfulness interventions for both clinical and non-clinical  
 137 populations. Therefore, it is crucial to define the essential characteristics of a mindfulness-  
 138 based programme (MBP) [1,19]. Rebecca Crane and her colleagues have identified the five

139 essential ingredients in MBPs which we will follow in carrying out this scoping review (Table  
140 2).

141 **Table 2: The Five Essential Ingredients of a Mindfulness-based Programme**

|    |                                                                                                                                                                                                      |
|----|------------------------------------------------------------------------------------------------------------------------------------------------------------------------------------------------------|
| 1. | It is informed by theories and practices that draw from a confluence of contemplative traditions, science and the disciplines of medicine, psychology, and education.                                |
| 2. | It is underpinned by a model of human experience which addresses the causes of human distress and the pathways to relieving it.                                                                      |
| 3. | Develops a new relationship with experience characterised by present moment focus, decentering, and an approach orientation.                                                                         |
| 4. | Supports the development of greater attentional, emotional, and behavioural self-regulation and positive qualities such as compassion, wisdom, and equanimity.                                       |
| 5. | Engages the participant in sustained intensive training in mindfulness meditation practice, in an experiential inquiry-based learning process and in exercises to develop insight and understanding. |

142 Source: Crane RS, Brewer J, Feldman C, Kabat-Zinn J, Santorelli S, Williams JMG, et al.

143 What defines mindfulness-based programs? The warp and the weft. *Psychol Med*.

144 2017;47(6):990–9, p993

#### 145 **Inclusion Criteria**

- 146 • Population: school pupils aged 7-16 years.
- 147 • Study design: Theoretical or empirical. The definition of mindfulness used in the  
148 study meets the essential requirements (Table 2).
- 149 • Documents: from any country or region.
- 150 • Any SBMI or theoretical discussion of SBMIs that describes a theory, model or  
151 framework connecting mindfulness to mental wellbeing in the design of the  
152 intervention or the discussion of the findings.
- 153 • Any publication date
- 154 • Document type: peer-reviewed theoretical or empirical research papers or PhD thesis

- 155 • Language: English.
- 156 • The primary or secondary outcome variable (where applicable) measures wellbeing
- 157 or mental wellbeing.

### 158 **Exclusion Criteria**

- 159 • There is no reference to a theory, model or framework being useful in the study
- 160 design or the discussion of outcomes.
- 161 • Only discusses theories for understanding how mindfulness interventions work with
- 162 clinical populations.
- 163 • Does not include an outcome measure of wellbeing or mental wellbeing.
- 164 • Only includes yoga.
- 165 • Mentions mechanisms but does not link them to a theory.
- 166 • Not delivered in a school.
- 167 • Only included pupils outside the 7-16 year age range.
- 168 • Grey literature excluding PhD thesis.
- 169 • Not peer-reviewed.
- 170 • In languages other than English.

### 171 **Step 3: study selection**

172 *Covidence* will be used to manage article screening and data extraction. A four-step search  
173 strategy will be utilised.

- 174 1. Extracting search results and removing duplicates and citations without abstracts or
- 175 summaries;
- 176 2. A single reviewer will review titles, determining eligibility based on the inclusion and
- 177 exclusion criteria;
- 178 3. Two reviewers will independently review the titles and abstracts remaining, following
- 179 step two. Differences will be resolved through discussion and, if necessary, by
- 180 bringing in a third reviewer;



181 4. All papers left after step 3 will be downloaded and independently evaluated by two  
182 reviewers. Differences will be resolved through discussion and, if necessary, by  
183 bringing in a third reviewer. Reasons will be recorded for excluding full-text articles  
184 and reported in the scoping review.

## 185 **Step 4: document appraisal and data extraction**

186 We will extract information from the documents that meet our inclusion criteria into an Excel  
187 spreadsheet. The extraction of data will be done under the following headings:

188 **General details of the paper:** search origin; author and date; title; type of paper (e.g.,  
189 review paper, primary quantitative study), and type of study.

190 **Population focus:** (where applicable) country of study, the age range of pupils, and gender.

191 **Exposure, mechanism, outcome details:** (where relevant) details of the mindfulness  
192 intervention.

193 **Theories:** All theories mentioned in the paper; the name of theories; a detailed description of  
194 each theory discussed in the paper; discipline.

195 If relevant, whether the theory was tested and if findings supported or refuted it; any policy  
196 implications explicitly reported.

197 The extraction tool will be piloted. PA, LD, IS and GN will independently read two documents  
198 and complete the extraction table. They will then meet, compare their extraction tables, and  
199 agree on necessary modifications.

200 PA will extract the data from the papers and GN will independently review a 10 per cent  
201 sample. The team will meet regularly to discuss the emerging findings and to resolve any  
202 differences between PA and GN.

203 The review to be performed is a focused scoping review to locate and describe existing  
204 theoretical models or frameworks; therefore, assessing the methodological quality of the  
205 papers is not appropriate.

## 206 **Step 5: Analysis and Reporting**

207 Our coding framework will capture the theories linking mindfulness to mental wellbeing. We  
208 will identify theory categories, compare theories within each pathway, and compare the  
209 theories identified.  
210 Our aim for this scoping review is to present a comprehensive descriptive map and  
211 explanation of the theories that have been used to justify the introduction of SBMIS for pupils  
212 aged 7-16 years and mental wellbeing. Study characteristics and theories will be presented  
213 in a table and summarised using a narrative synthesis approach.

## 214 **Ethics**

215 Formal ethics approval is not required for a literature review. However, ethical approval has  
216 been obtained from the University of Aberdeen, Addis Ababa University, and the University  
217 of Rwanda for the research programme, of which this scoping review forms an integral  
218 element.

## 219 **Dissemination**

220 We will publish at least one article in a peer review journal reporting the findings from the  
221 literature review. Findings from the review will also be disseminated via seminar and  
222 conference presentations and podcasts posted on the project website and via social media.

223

224 **Authors' Contributions:** PA, GN, and LD contributed to the NIHR grant application. PA led  
225 the research design and the protocol's writing and produced the first draft. GN, IS and LD  
226 revised drafts and agreed on the final text of this paper.

## 227 **References**

- 228 1. Crane RS, Brewer J, Feldman C, Kabat-Zinn J, Santorelli S, Williams JMG, et al.  
229 What defines mindfulness-based programs? The warp and the weft. Psychol Med.

- 230 2017;47: 990–999. doi:10.1017/S0033291716003317
- 231 2. Teasdale J. What Happens in Mindfulness. New York, NY and London: Guilford  
232 Press; 2022.
- 233 3. Feldman C, Kuyken W. Mindfulness: Ancient Wisdom Meets Modern Psychology.  
234 New York and London: The Guildford Press; 2019. Available:  
235 <https://www.guilford.com/books/Mindfulness/Feldman-Kuyken/9781462540105>
- 236 4. Hudson KG, Lawton R, Hugh-Jones S. Factors affecting the implementation of a  
237 whole school mindfulness program: A qualitative study using the consolidated  
238 framework for implementation research. BMC Health Serv Res. 2020;20: 1–13.  
239 doi:10.1186/s12913-020-4942-z
- 240 5. Šouláková B, Kasa A, Butzer B, Winkler P. Meta-Review on the Effectiveness of  
241 Classroom-Based Psychological Interventions Aimed at Improving Student Mental  
242 Health and Well-Being, and Preventing Mental Illness. J Prim Prev. 2019;40: 255–  
243 278.
- 244 6. Zenner C, Herrnleben-Kurz S, Walach H. Mindfulness-based interventions in schools-  
245 a systematic review and meta-analysis. Front Psychol. 2014;5: 1–20.  
246 doi:10.3389/fpsyg.2014.00603. PMID: 25071620; PMCID: PMC4075476
- 247 7. Carsley D, Khoury B, Heath NL. Effectiveness of Mindfulness Interventions for Mental  
248 Health in Schools: A Comprehensive Meta-analysis. Mindfulness (N Y). 2018;9: 693–  
249 707. doi:10.1007/s12671-017-0839-2
- 250 8. Zhang D, Lee EKP, Mak ECW, Ho CY, Wong SYS. Mindfulness-based interventions:  
251 An overall review. Br Med Bull. 2021;138: 41–57. doi:10.1093/bmb/ldab005
- 252 9. Roeser RW, Greenberg MT, Frazier T, Galla BM, Semenov AD, Warren MT. Beyond  
253 All Splits: Envisioning the Next Generation of Science on Mindfulness and  
254 Compassion in Schools for Students. Mindfulness (N Y). 2022. doi:10.1007/s12671-  
255 022-02017-z
- 256 10. Kuyken W, Weare K, Ukoumunne OC, Vicary R, Motton N, Burnett R, et al.  
257 Effectiveness of the Mindfulness in Schools Programme: Non-randomised controlled

- 258 feasibility study. *Br J Psychiatry*. 2013;203: 126–131. doi:10.1192/bjp.bp.113.126649
- 259 11. Rempel KDD. Mindfulness for Children and Youth: A Review of the Literature with an  
260 Argument for School-Based Implementation Méditation de pleine conscience pour les  
261 enfants et les jeunes: Survol de la littérature et argumentation pour sa mise en oeuvre  
262 en milieu scol. *Can J Couns Psychother*. 2012;46: 201–220. Available:  
263 <https://mindfulnessinschools.org/wp-content/uploads/2013/09/remple.pdf>
- 264 12. Klingbeil DA, Renshaw TL, Willenbrink JB, Copek RA, Chan KT, Haddock A, et al.  
265 Mindfulness-based Interventions with Youth: A Comprehensive Meta-analysis of  
266 Group-design Studies. *J Sch Psychol*. 2017;63: 77–103.
- 267 13. Phan ML, Renshaw TL, Caramanico J, Greeson JM, MacKenzie E, Atkinson-Diaz Z,  
268 et al. Mindfulness-Based School Interventions: a Systematic Review of Outcome  
269 Evidence Quality by Study Design. *Mindfulness (N Y)*. 2022;13: 1591–1613.  
270 doi:10.1007/s12671-022-01885-9
- 271 14. Weare K, Bethune A. Implementing Mindfulness in Schools: An Evidence-Based  
272 Guide. London: The Mindfulness Initiative Sheffield; 2021. Available:  
273 [www.themindfulnessinitiative.org/appeal/donate](http://www.themindfulnessinitiative.org/appeal/donate)
- 274 15. Krame K. The Efficacy of Mindfulness-Based Interventions on Occupational Stress  
275 and Burnout among K-12 Educators: A Review of the Literature. Vienna: World  
276 Conference on Teaching and Education; 2021.
- 277 16. Lomas T, Medina JCC, Ivztan I, Rupprecht S, Eiroa-Orosa FJJ. The impact of  
278 mindfulness on the wellbeing and performance of educators: A systematic review of  
279 the empirical literature. *Teach Teach Educ*. 2017;61: 132–141.  
280 doi:10.1016/j.tate.2016.10.008
- 281 17. Emerson LM, Leyland A, Hudson K, Rowse G, Hanley P, Hugh-Jones S. Teaching  
282 Mindfulness to Teachers: a Systematic Review and Narrative Synthesis. *Mindfulness*  
283 (N Y). 2017;8: 1136–1149. doi:10.1007/s12671-017-0691-4
- 284 18. Klingbeil DA, Renshaw TL. Mindfulness-based interventions for teachers: A meta-  
285 analysis of the emerging evidence base. *Sch Psychol Q*. 2018;33: 501–511.

- 286 doi:10.1037/spq0000291
- 287 19. Van Dam NT, van Vugt MK, Vago DR, Schmalzl L, Saron CD, Olendzki A, et al. Mind  
288 the Hype: A Critical Evaluation and Prescriptive Agenda for Research on Mindfulness  
289 and Meditation. *Perspect Psychol Sci.* 2018;13: 36–61.  
290 doi:10.1177/1745691617709589
- 291 20. Emerson LM, de Diaz NN, Sherwood A, Waters A, Farrell L. Mindfulness interventions  
292 in schools: Integrity and feasibility of implementation. *Int J Behav Dev.* 2020;44: 62–  
293 75. doi:10.1177/0165025419866906
- 294 21. Lucas-Thompson RG, Moran MJ. Advancing the Study of Mindfulness-Based  
295 Interventions in Relation to Psychological Health. *Int J Environ Res Public Health.*  
296 2023;20: 4–8. doi:10.3390/ijerph20085473
- 297 22. Lindsay EK, Creswell JD. Mechanisms of Mindfulness Training: Monitor and  
298 Acceptance Theory (MAT). *Clin Psychol Rev.* 2017;51: 48–59.  
299 doi:10.1016/j.cpr.2016.10.011
- 300 23. Rupprecht S, Koole W, Chaskalson M, Tamdjidi C, West M. Running too far ahead?  
301 Towards a broader understanding of mindfulness in organisations. *Curr Opin Psychol.*  
302 2019;28: 32–36. doi:10.1016/j.copsy.2018.10.007
- 303 24. National Institute for Health and Clinical Excellence. Behaviour Change at Population,  
304 Community and Individual Levels. London: National Institute for Health and Clinical  
305 Excellence; 2007. Available: [https://www.ncsct.co.uk/usr/pub/guidance-on-behaviour-  
306 change-at-population.pdf](https://www.ncsct.co.uk/usr/pub/guidance-on-behaviour-change-at-population.pdf)
- 307 25. Abbott P, D'Ambruoso L, Yared M, McNamee P, Nzabairwa W. Study protocol for a  
308 Critical Realist pilot cluster-randomised controlled trial of a whole-school-based  
309 mindfulness intervention (SBMI) promoting child and adolescent mental wellbeing in  
310 Rwanda and Ethiopia. *medRxiv.* 2023; May.
- 311 26. Peters MDJ, Godfrey C, Mclnerney P, Khalil H, Larsen P, Marnie C, et al. Best  
312 practice guidance and reporting items for the development of scoping review  
313 protocols. *JBI Evid Synth.* 2022;20: 953–968. doi:10.11124/JBIES-21-00242

- 314 27. Campbell M, Egan M, Lorenc T, Bond L, Popham F, Fenton C, et al. Considering  
315 methodological options for reviews of theory: Illustrated by a review of theories linking  
316 income and health. *Syst Rev.* 2014;3: 1–11. doi:10.1186/2046-4053-3-114
- 317 28. PRISMA. Preferred Reporting Items for Systematic Reviews and Meta-Analyses  
318 Extension for Scoping Reviews (PRISMA-ScR) Checklist. [cited 15 May 2023].  
319 Available: <http://www.prisma-statement.org/Extensions/ScopingReviews>

## 320 **Supporting Information**

- 321 **S1 Table: Preferred Reporting Items for Systematic reviews and Meta-Analyses**  
322 **extension for Scoping Reviews (PRISMA-ScR) Checklist**
- 323 **S2 Table: Search Strategy**
- 324
